# Supplementary material for: Determination of Diphtheria Toxin in Bacterial Cultures by Enzyme Immunoassay
Source: MDPI journal article supplement (doi:10.3390/diagnostics12092204), 2022-09-11
Supplement: s1 [file s1]

**Table S1.** The results of the detection of diphtheria toxin (DT) by sandwich ELISA in corynebacterial cultures.

| Nr. | GCLoD collection Nr. | Species               | tox gene (by PCR) | Toxin production (by Elek test) | ELISA results |                                       |
|-----|----------------------|-----------------------|-------------------|---------------------------------|---------------|---------------------------------------|
|     |                      |                       |                   |                                 | Qualitative   | Determined toxin concentration, ng/mL |
| 1   | NCTC 3984            | <i>C. diphtheriae</i> | Pos               | Pos                             | Pos           | 878.4                                 |
| 2   | NCTC 10648           | <i>C. diphtheriae</i> | Pos               | Pos                             | Pos           | 3370.0                                |
| 3   | KL 280               | <i>C. diphtheriae</i> | Pos               | Pos                             | Pos           | 1865.7                                |
| 4   | KL 339               | <i>C. diphtheriae</i> | Pos               | Pos                             | Pos           | 1405.6                                |
| 5   | KL 363               | <i>C. diphtheriae</i> | Pos               | Pos                             | Pos           | 858.2                                 |
| 6   | KL 364               | <i>C. diphtheriae</i> | Pos               | Pos                             | Pos           | 2574.0                                |
| 7   | KL 390               | <i>C. diphtheriae</i> | Pos               | Pos                             | Pos           | 1057.1                                |
| 8   | KL 532               | <i>C. diphtheriae</i> | Pos               | Pos                             | Pos           | 794.7                                 |
| 9   | KL 565               | <i>C. diphtheriae</i> | Pos               | Pos                             | Pos           | 762.2                                 |
| 10  | KL 603               | <i>C. diphtheriae</i> | Pos               | Pos                             | Pos           | 1043.0                                |
| 11  | KL 613               | <i>C. diphtheriae</i> | Pos               | Pos                             | Pos           | 1096.3                                |
| 12  | KL 623               | <i>C. diphtheriae</i> | Pos               | Pos                             | Pos           | 619.2                                 |
| 13  | KL 625               | <i>C. diphtheriae</i> | Pos               | Pos                             | Pos           | 581.5                                 |
| 14  | KL 631               | <i>C. diphtheriae</i> | Pos               | Pos                             | Pos           | 776.4                                 |
| 15  | KL 633               | <i>C. diphtheriae</i> | Pos               | Pos                             | Pos           | 719.1                                 |
| 16  | KL 638               | <i>C. diphtheriae</i> | Pos               | Pos                             | Pos           | 299.1                                 |
| 17  | KL 652               | <i>C. diphtheriae</i> | Pos               | Pos                             | Pos           | 271.6                                 |
| 18  | KL 654               | <i>C. diphtheriae</i> | Pos               | Pos                             | Pos           | 288.5                                 |
| 19  | KL 663               | <i>C. diphtheriae</i> | Pos               | Pos                             | Pos           | 221.9                                 |
| 20  | KL 670               | <i>C. diphtheriae</i> | Pos               | Pos                             | Pos           | 56.4                                  |
| 21  | KL 682               | <i>C. diphtheriae</i> | Pos               | Pos                             | Pos           | 55.4                                  |
| 22  | KL 697               | <i>C. diphtheriae</i> | Pos               | Pos                             | Pos           | 402.0                                 |
| 23  | KL 839               | <i>C. diphtheriae</i> | Pos               | Pos                             | Pos           | 481.8                                 |
| 24  | KL 857               | <i>C. diphtheriae</i> | Pos               | Pos                             | Pos           | 336.5                                 |
| 25  | KL 950               | <i>C. diphtheriae</i> | Pos               | Pos                             | Pos           | 417.8                                 |
| 26  | KL 956               | <i>C. diphtheriae</i> | Pos               | Pos                             | Pos           | 633.9                                 |
| 27  | KL 1059              | <i>C. diphtheriae</i> | Pos               | Pos                             | Pos           | 1301.4                                |
| 28  | KL 1303              | <i>C. diphtheriae</i> | Pos               | Pos                             | Pos           | 843.0                                 |
| 29  | KL 1438              | <i>C. diphtheriae</i> | Pos               | Pos                             | Pos           | 248.7                                 |
| 30  | KL 1648              | <i>C. diphtheriae</i> | Pos               | Pos                             | Pos           | 742.3                                 |
| 31  | KL 1670              | <i>C. diphtheriae</i> | Pos               | Pos                             | Pos           | 769.6                                 |
| 32  | KL 1675              | <i>C. diphtheriae</i> | Pos               | Pos                             | Pos           | 902.2                                 |
| 33  | KL 1686              | <i>C. diphtheriae</i> | Pos               | Pos                             | Pos           | 633.9                                 |
| 34  | KL 1692              | <i>C. diphtheriae</i> | Pos               | Pos                             | Pos           | 788.4                                 |
| 35  | KL 1693              | <i>C. diphtheriae</i> | Pos               | Pos                             | Pos           | 1066.1                                |
| 36  | KL 1695              | <i>C. diphtheriae</i> | Pos               | Pos                             | Pos           | 1150.1                                |
| 37  | KL 1701              | <i>C. diphtheriae</i> | Pos               | Pos                             | Pos           | 1251.0                                |
| 38  | KL 1704              | <i>C. diphtheriae</i> | Pos               | Pos                             | Pos           | 1325.7                                |
| 39  | KL 1707              | <i>C. diphtheriae</i> | Pos               | Pos                             | Pos           | 1040.1                                |

|    |         |                       |     |     |     |        |
|----|---------|-----------------------|-----|-----|-----|--------|
| 40 | KL 1747 | <i>C. diphtheriae</i> | Pos | Pos | Pos | 1139.5 |
| 41 | KL 1754 | <i>C. diphtheriae</i> | Pos | Pos | Pos | 1189.5 |
| 42 | KL 1755 | <i>C. diphtheriae</i> | Pos | Pos | Pos | 1255.2 |
| 43 | KL 1961 | <i>C. diphtheriae</i> | Pos | Pos | Pos | 931.0  |
| 44 | KL 215  | <i>C. diphtheriae</i> | Neg | n/d | Neg | 0      |
| 45 | KL 240  | <i>C. diphtheriae</i> | Neg | n/d | Neg | 0      |
| 46 | KL 286  | <i>C. diphtheriae</i> | Neg | n/d | Neg | 0      |
| 47 | KL 299  | <i>C. diphtheriae</i> | Neg | n/d | Neg | 0      |
| 48 | KL 370  | <i>C. diphtheriae</i> | Neg | n/d | Neg | 0      |
| 49 | KL 356  | <i>C. diphtheriae</i> | Neg | n/d | Neg | 0      |
| 50 | KL 355  | <i>C. diphtheriae</i> | Neg | n/d | Neg | 0      |
| 51 | KL 358  | <i>C. diphtheriae</i> | Neg | n/d | Neg | 0      |
| 52 | KL 377  | <i>C. diphtheriae</i> | Neg | n/d | Neg | 0      |
| 53 | KL 402  | <i>C. diphtheriae</i> | Neg | n/d | Neg | 0      |
| 54 | KL 434  | <i>C. diphtheriae</i> | Neg | n/d | Neg | 0      |
| 55 | KL 461  | <i>C. diphtheriae</i> | Neg | n/d | Neg | 0      |
| 56 | KL 476  | <i>C. diphtheriae</i> | Neg | n/d | Neg | 0      |
| 57 | KL 478  | <i>C. diphtheriae</i> | Neg | n/d | Neg | 0      |
| 58 | KL 479  | <i>C. diphtheriae</i> | Neg | n/d | Neg | 0      |
| 59 | KL 507  | <i>C. diphtheriae</i> | Neg | n/d | Neg | 0      |
| 60 | KL 517  | <i>C. diphtheriae</i> | Neg | n/d | Neg | 0      |
| 61 | KL 557  | <i>C. diphtheriae</i> | Neg | n/d | Neg | 0      |
| 62 | KL 588  | <i>C. diphtheriae</i> | Neg | n/d | Neg | 0      |
| 63 | KL 594  | <i>C. diphtheriae</i> | Neg | n/d | Neg | 0      |
| 64 | KL 596  | <i>C. diphtheriae</i> | Neg | n/d | Neg | 0      |
| 65 | KL 637  | <i>C. diphtheriae</i> | Neg | n/d | Neg | 0      |
| 66 | KL 762  | <i>C. diphtheriae</i> | Neg | n/d | Neg | 0      |
| 67 | KL 765  | <i>C. diphtheriae</i> | Neg | n/d | Neg | 0      |
| 68 | KL 809  | <i>C. diphtheriae</i> | Neg | n/d | Neg | 0      |
| 69 | KL 816  | <i>C. diphtheriae</i> | Neg | n/d | Neg | 0      |
| 70 | KL 828  | <i>C. diphtheriae</i> | Neg | n/d | Neg | 0      |
| 71 | KL 888  | <i>C. diphtheriae</i> | Neg | n/d | Neg | 0      |
| 72 | KL 895  | <i>C. diphtheriae</i> | Neg | n/d | Neg | 0      |
| 73 | KL 920  | <i>C. diphtheriae</i> | Neg | n/d | Neg | 0      |
| 74 | KL 936  | <i>C. diphtheriae</i> | Neg | n/d | Neg | 0      |
| 75 | KL 940  | <i>C. diphtheriae</i> | Neg | n/d | Neg | 0      |
| 76 | KL 948  | <i>C. diphtheriae</i> | Neg | n/d | Neg | 0      |
| 77 | KL 961  | <i>C. diphtheriae</i> | Neg | n/d | Neg | 0      |
| 78 | KL 964  | <i>C. diphtheriae</i> | Neg | n/d | Neg | 0      |
| 79 | KL 965  | <i>C. diphtheriae</i> | Neg | n/d | Neg | 0      |
| 80 | KL 969  | <i>C. diphtheriae</i> | Neg | n/d | Neg | 0      |
| 81 | KL 985  | <i>C. diphtheriae</i> | Neg | n/d | Neg | 0      |
| 82 | KL 1058 | <i>C. diphtheriae</i> | Neg | n/d | Neg | 0      |
| 83 | KL 1284 | <i>C. diphtheriae</i> | Neg | n/d | Neg | 0      |
| 84 | KL 1296 | <i>C. diphtheriae</i> | Neg | n/d | Neg | 0      |
| 85 | KL 1305 | <i>C. diphtheriae</i> | Neg | n/d | Neg | 0      |

|     |         |                              |     |     |     |        |
|-----|---------|------------------------------|-----|-----|-----|--------|
| 86  | KL 1306 | <i>C. diphtheriae</i>        | Neg | n/d | Neg | 0      |
| 87  | KL 1312 | <i>C. diphtheriae</i>        | Neg | n/d | Neg | 0      |
| 88  | KL 1333 | <i>C. diphtheriae</i>        | Neg | n/d | Neg | 0      |
| 89  | KL 1336 | <i>C. diphtheriae</i>        | Neg | n/d | Neg | 0      |
| 90  | KL 1349 | <i>C. diphtheriae</i>        | Neg | n/d | Neg | 0      |
| 91  | KL 1351 | <i>C. diphtheriae</i>        | Neg | n/d | Neg | 0      |
| 92  | KL 1352 | <i>C. diphtheriae</i>        | Neg | n/d | Neg | 0      |
| 93  | KL 1355 | <i>C. diphtheriae</i>        | Neg | n/d | Neg | 0      |
| 94  | KL 1364 | <i>C. diphtheriae</i>        | Neg | n/d | Neg | 0      |
| 95  | KL 1424 | <i>C. diphtheriae</i>        | Neg | n/d | Neg | 0      |
| 96  | KL 1748 | <i>C. diphtheriae</i>        | Neg | n/d | Neg | 0      |
| 97  | KL 1749 | <i>C. diphtheriae</i>        | Neg | n/d | Neg | 0      |
| 98  | KL 1807 | <i>C. diphtheriae</i>        | Neg | n/d | Neg | 0      |
| 99  | KL 1812 | <i>C. diphtheriae</i>        | Neg | n/d | Neg | 0      |
| 100 | KL 1840 | <i>C. diphtheriae</i>        | Neg | n/d | Neg | 0      |
| 101 | KL 1841 | <i>C. diphtheriae</i>        | Neg | n/d | Neg | 0      |
| 102 | KL 179  | <i>C. diphtheriae</i> (NTTB) | Pos | Neg | Neg | 0      |
| 103 | KL 1810 | <i>C. diphtheriae</i> (NTTB) | Pos | Neg | Neg | 0      |
| 104 | KL 1854 | <i>C. diphtheriae</i> (NTTB) | Pos | Neg | Neg | 0      |
| 105 | KL 182  | <i>C. silvaticum</i> (NTTB)  | Pos | Neg | Neg | 0      |
| 106 | KL 1848 | <i>C. silvaticum</i> (NTTB)  | Pos | Neg | Neg | 0      |
| 107 | M06-759 | <i>C. ulcerans</i>           | Pos | Pos | Pos | 2514.8 |
| 108 | KL107   | <i>C. ulcerans</i>           | Pos | Pos | Pos | 71.3   |
| 109 | KL 109  | <i>C. ulcerans</i>           | Pos | Pos | Pos | 364.3  |
| 110 | KL 110  | <i>C. ulcerans</i>           | Pos | Pos | Pos | 402.8  |
| 111 | KL 126  | <i>C. ulcerans</i>           | Pos | Pos | Pos | 414.4  |
| 112 | KL 188  | <i>C. ulcerans</i>           | Pos | Pos | Pos | 70.9   |
| 113 | KL 190  | <i>C. ulcerans</i>           | Pos | Pos | Pos | 138.5  |
| 114 | KL 200  | <i>C. ulcerans</i>           | Pos | Pos | Pos | 58.9   |
| 115 | KL 203  | <i>C. ulcerans</i>           | Pos | Pos | Pos | 33.6   |
| 116 | KL 239  | <i>C. ulcerans</i>           | Pos | Pos | Pos | 71.2   |
| 117 | KL 241  | <i>C. ulcerans</i>           | Pos | Pos | Pos | 162.5  |
| 118 | KL 242  | <i>C. ulcerans</i>           | Pos | Pos | Pos | 59.8   |
| 119 | KL 246  | <i>C. ulcerans</i>           | Pos | Pos | Pos | 137.7  |
| 120 | KL 249  | <i>C. ulcerans</i>           | Pos | Pos | Pos | 53.7   |
| 121 | KL 251  | <i>C. ulcerans</i>           | Pos | Pos | Pos | 87.7   |
| 122 | KL 255  | <i>C. ulcerans</i>           | Pos | Pos | Pos | 73.6   |
| 123 | KL 261  | <i>C. ulcerans</i>           | Pos | Pos | Pos | 68.5   |
| 124 | KL 272  | <i>C. ulcerans</i>           | Pos | Pos | Pos | 70.5   |
| 125 | KL 296  | <i>C. ulcerans</i>           | Pos | Pos | Pos | 83.7   |
| 126 | KL 297  | <i>C. ulcerans</i>           | Pos | Pos | Pos | 19.2   |
| 127 | KL 301  | <i>C. ulcerans</i>           | Pos | Pos | Pos | 75.6   |
| 128 | KL 315  | <i>C. ulcerans</i>           | Pos | Pos | Pos | 135.3  |
| 129 | KL 318  | <i>C. ulcerans</i>           | Pos | Pos | Pos | 186.6  |
| 130 | KL 320  | <i>C. ulcerans</i>           | Pos | Pos | Pos | 87.5   |
| 131 | KL 332  | <i>C. ulcerans</i>           | Pos | Pos | Pos | 114.4  |

|     |                |                           |            |            |            |          |
|-----|----------------|---------------------------|------------|------------|------------|----------|
| 132 | KL 337         | <i>C. ulcerans</i>        | Pos        | Pos        | Pos        | 70.9     |
| 133 | KL 345         | <i>C. ulcerans</i>        | Pos        | Pos        | Pos        | 6.0      |
| 134 | KL 367         | <i>C. ulcerans</i>        | Pos        | Pos        | Pos        | 22.7     |
| 135 | KL 380         | <i>C. ulcerans</i>        | Pos        | Pos        | Pos        | 26.9     |
| 136 | KL 381         | <i>C. ulcerans</i>        | Pos        | Pos        | Pos        | 17.7     |
| 137 | KL 387         | <i>C. ulcerans</i>        | Pos        | Pos        | Pos        | 26.3     |
| 138 | KL 392         | <i>C. ulcerans</i>        | Pos        | Pos        | Pos        | 20.0     |
| 139 | KL 433         | <i>C. ulcerans</i>        | Pos        | Pos        | Pos        | 28.6     |
| 140 | KL 475         | <i>C. ulcerans</i>        | Pos        | Pos        | Pos        | 20.5     |
| 141 | KL 483         | <i>C. ulcerans</i>        | Pos        | Pos        | Pos        | 27.6     |
| 142 | KL 492         | <i>C. ulcerans</i>        | Pos        | Pos        | Pos        | 10.0     |
| 143 | KL 497         | <i>C. ulcerans</i>        | Pos        | Pos        | Pos        | 9.2      |
| 144 | KL 501         | <i>C. ulcerans</i>        | Pos        | Pos        | Pos        | 15.0     |
| 145 | KL 515         | <i>C. ulcerans</i>        | Pos        | Pos        | Pos        | 2.8      |
| 146 | KL 540         | <i>C. ulcerans</i>        | Pos        | Pos        | Pos        | 14.4     |
| 147 | KL 541         | <i>C. ulcerans</i>        | Pos        | Pos        | Pos        | 18.0     |
| 148 | KL 547         | <i>C. ulcerans</i>        | Pos        | Pos        | Pos        | 3.4      |
| 149 | KL 556         | <i>C. ulcerans</i>        | Pos        | Pos        | Pos        | 13.9     |
| 150 | KL 568         | <i>C. ulcerans</i>        | Pos        | Pos        | Pos        | 11.7     |
| 151 | KL 1294        | <i>C. ulcerans</i>        | Pos        | Pos        | Pos        | 44.6     |
| 152 | KL 1357        | <i>C. ulcerans</i>        | Pos        | Pos        | Pos        | 87.0     |
| 153 | KL 1370        | <i>C. ulcerans</i>        | Pos        | Pos        | Pos        | 23.4     |
| 154 | KL 1750        | <i>C. ulcerans</i>        | Pos        | Pos        | Pos        | 167.2    |
| 155 | KL 1779        | <i>C. ulcerans</i>        | Pos        | Pos        | Pos        | 103.0    |
| 156 | KL 1809        | <i>C. ulcerans</i>        | Pos        | Pos        | Pos        | 90.0     |
| 157 | KL 1819        | <i>C. ulcerans</i>        | Pos        | Pos        | Pos        | 182.0    |
| 158 | KL 1825        | <i>C. ulcerans</i>        | Pos        | Pos        | Pos        | 14.4     |
| 159 | KL 1832        | <i>C. ulcerans</i>        | Pos        | Pos        | Pos        | 200.0    |
| 160 | KL 1853        | <i>C. ulcerans</i>        | Pos        | Pos        | Pos        | 181.0    |
| 161 | KL 1972        | <i>C. ulcerans</i>        | Pos        | Pos        | Pos        | 91.0     |
| 162 | <b>KL 1902</b> | <b><i>C. ulcerans</i></b> | <b>Pos</b> | <b>Pos</b> | <b>Neg</b> | <b>0</b> |
| 163 | KL 199         | <i>C. ulcerans</i>        | Neg        | n/d        | Neg        | 0        |
| 164 | KL 244         | <i>C. ulcerans</i>        | Neg        | n/d        | Neg        | 0        |
| 165 | KL 274         | <i>C. ulcerans</i>        | Neg        | n/d        | Neg        | 0        |
| 166 | KL 275         | <i>C. ulcerans</i>        | Neg        | n/d        | Neg        | 0        |
| 167 | KL 349         | <i>C. ulcerans</i>        | Neg        | n/d        | Neg        | 0        |
| 168 | KL 366         | <i>C. ulcerans</i>        | Neg        | n/d        | Neg        | 0        |
| 169 | KL 451         | <i>C. ulcerans</i>        | Neg        | n/d        | Neg        | 0        |
| 170 | KL 456a        | <i>C. ulcerans</i>        | Neg        | n/d        | Neg        | 0        |
| 171 | KL 490         | <i>C. ulcerans</i>        | Neg        | n/d        | Neg        | 0        |
| 172 | KL 841         | <i>C. ulcerans</i>        | Neg        | n/d        | Neg        | 0        |
| 173 | KL 853         | <i>C. ulcerans</i>        | Neg        | n/d        | Neg        | 0        |
| 174 | KL 862         | <i>C. ulcerans</i>        | Neg        | n/d        | Neg        | 0        |
| 175 | KL 876         | <i>C. ulcerans</i>        | Neg        | n/d        | Neg        | 0        |
| 176 | KL 941         | <i>C. ulcerans</i>        | Neg        | n/d        | Neg        | 0        |
| 177 | KL 1017        | <i>C. ulcerans</i>        | Neg        | n/d        | Neg        | 0        |

|     |           |                                |     |     |     |   |
|-----|-----------|--------------------------------|-----|-----|-----|---|
| 178 | KL 1021   | <i>C. ulcerans</i>             | Neg | n/d | Neg | 0 |
| 179 | KL 1295   | <i>C. ulcerans</i>             | Neg | n/d | Neg | 0 |
| 180 | KL 1321   | <i>C. ulcerans</i>             | Neg | n/d | Neg | 0 |
| 181 | KL 1335   | <i>C. ulcerans</i>             | Neg | n/d | Neg | 0 |
| 182 | KL 1340   | <i>C. ulcerans</i>             | Neg | n/d | Neg | 0 |
| 183 | KL 1361   | <i>C. ulcerans</i>             | Neg | n/d | Neg | 0 |
| 184 | KL 1447   | <i>C. ulcerans</i>             | Neg | n/d | Neg | 0 |
| 185 | KL 1455   | <i>C. ulcerans</i>             | Neg | n/d | Neg | 0 |
| 186 | KL 1465   | <i>C. ulcerans</i>             | Neg | n/d | Neg | 0 |
| 187 | KL 1466   | <i>C. ulcerans</i>             | Neg | n/d | Neg | 0 |
| 188 | KL 1474   | <i>C. ulcerans</i>             | Neg | n/d | Neg | 0 |
| 189 | KL 1540   | <i>C. ulcerans</i>             | Neg | n/d | Neg | 0 |
| 190 | KL 1563   | <i>C. ulcerans</i>             | Neg | n/d | Neg | 0 |
| 191 | KL 1574   | <i>C. ulcerans</i>             | Neg | n/d | Neg | 0 |
| 192 | KL 1578   | <i>C. ulcerans</i>             | Neg | n/d | Neg | 0 |
| 193 | KL 1583   | <i>C. ulcerans</i>             | Neg | n/d | Neg | 0 |
| 194 | KL 1596   | <i>C. ulcerans</i>             | Neg | n/d | Neg | 0 |
| 195 | KL 1622   | <i>C. ulcerans</i>             | Neg | n/d | Neg | 0 |
| 196 | KL 1649   | <i>C. ulcerans</i>             | Neg | n/d | Neg | 0 |
| 197 | KL 1664   | <i>C. ulcerans</i>             | Neg | n/d | Neg | 0 |
| 198 | KL 1665   | <i>C. ulcerans</i>             | Neg | n/d | Neg | 0 |
| 199 | KL 1694   | <i>C. ulcerans</i>             | Neg | n/d | Neg | 0 |
| 200 | KL 1743   | <i>C. ulcerans</i>             | Neg | n/d | Neg | 0 |
| 201 | KL 1802   | <i>C. ulcerans</i>             | Neg | n/d | Neg | 0 |
| 202 | KL 1808   | <i>C. ulcerans</i>             | Neg | n/d | Neg | 0 |
| 203 | KL 1971   | <i>C. ulcerans</i>             | Neg | n/d | Neg | 0 |
| 204 | HB 457    | <i>C. pseudotuberculosis</i>   | Neg | Neg | Neg | 0 |
| 205 | DSM 7180  | <i>C. pseudotuberculosis</i>   | Neg | Neg | Neg | 0 |
| 206 | DSM 20689 | <i>C. pseudotuberculosis</i>   | Neg | Neg | Neg | 0 |
| 207 | KL 1634   | <i>C. pseudotuberculosis</i>   | Neg | Neg | Neg | 0 |
| 208 | KL 1635   | <i>C. pseudotuberculosis</i>   | Neg | Neg | Neg | 0 |
| 209 | KL 128    | <i>C. accolens</i>             | Neg | n/d | Neg | 0 |
| 210 | KL 129    | <i>C. accolens</i>             | Neg | n/d | Neg | 0 |
| 211 | KL 1452   | <i>C. pseudodiphtheriticum</i> | Neg | n/d | Neg | 0 |
| 212 | KL 1522   | <i>C. amycolatum</i>           | Neg | n/d | Neg | 0 |
| 213 | KL 1536   | <i>C. striatum</i>             | Neg | n/d | Neg | 0 |
| 214 | KL1566    | <i>C. amycolatum</i>           | Neg | n/d | Neg | 0 |
| 215 | KL 1680   | <i>C. amycolatum</i>           | Neg | n/d | Neg | 0 |
| 216 | KL 1684   | <i>C. amycolatum</i>           | Neg | n/d | Neg | 0 |
| 217 | KL 1711   | <i>C. amycolatum</i>           | Neg | n/d | Neg | 0 |
| 218 | KL 1715   | <i>C. tuberculostearicum</i>   | Neg | n/d | Neg | 0 |

Neg – negative; Pos – positive; NTTB – non-toxigenic *tox*-negative. Highlighted in bold - strain KL 1902 with “unusual” properties. Note - in the absence of the *tox* gene, DT in most cases was not determined (n/d).

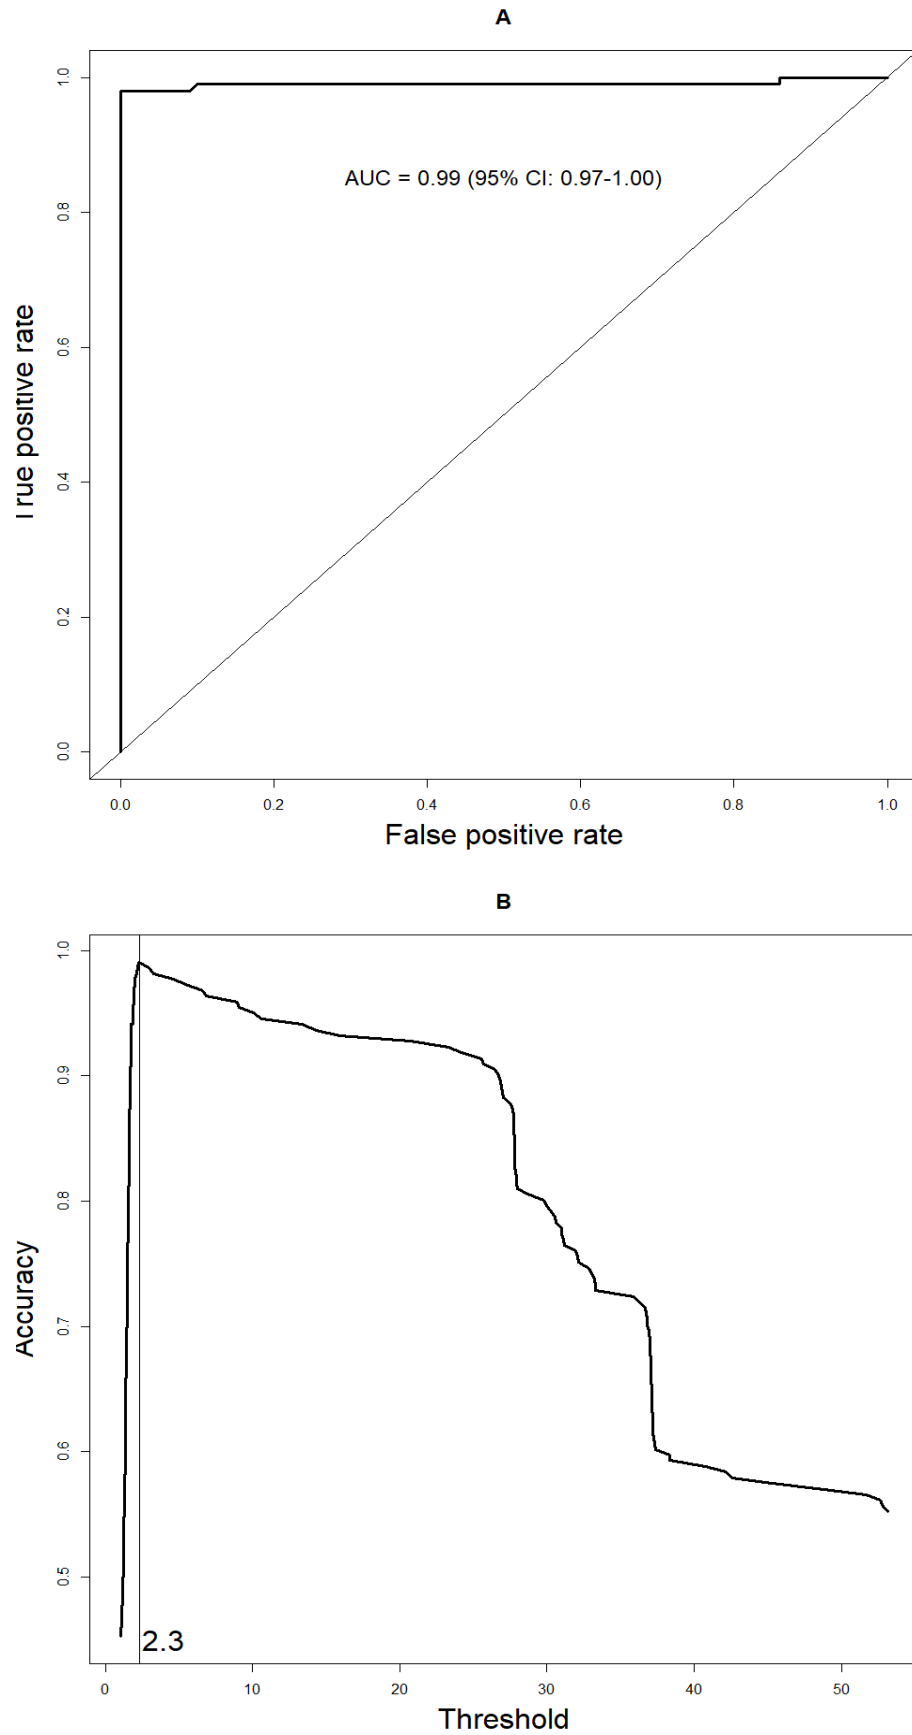

**Figure S1.** ROC-curve (A) and threshold-accuracy dependence curve (B) obtained as results of ROC analysis of ELISA results. AUC, 95% CI for AUC, as well as the signal/background ratio threshold at maximal accuracy are showed. CI – confidence interval.
